# Supplementary material for: A laser ablation system for the analysis of radioactive samples using inductively coupled plasma mass spectrometry
Source: Royal Society of Chemistry journal article supplement (doi:10.1039/b616364e), 2007-01-01
Supplement: supp_mat.doc [file supp_mat.doc]

This journal © The Royal Society of Chemistry 2007


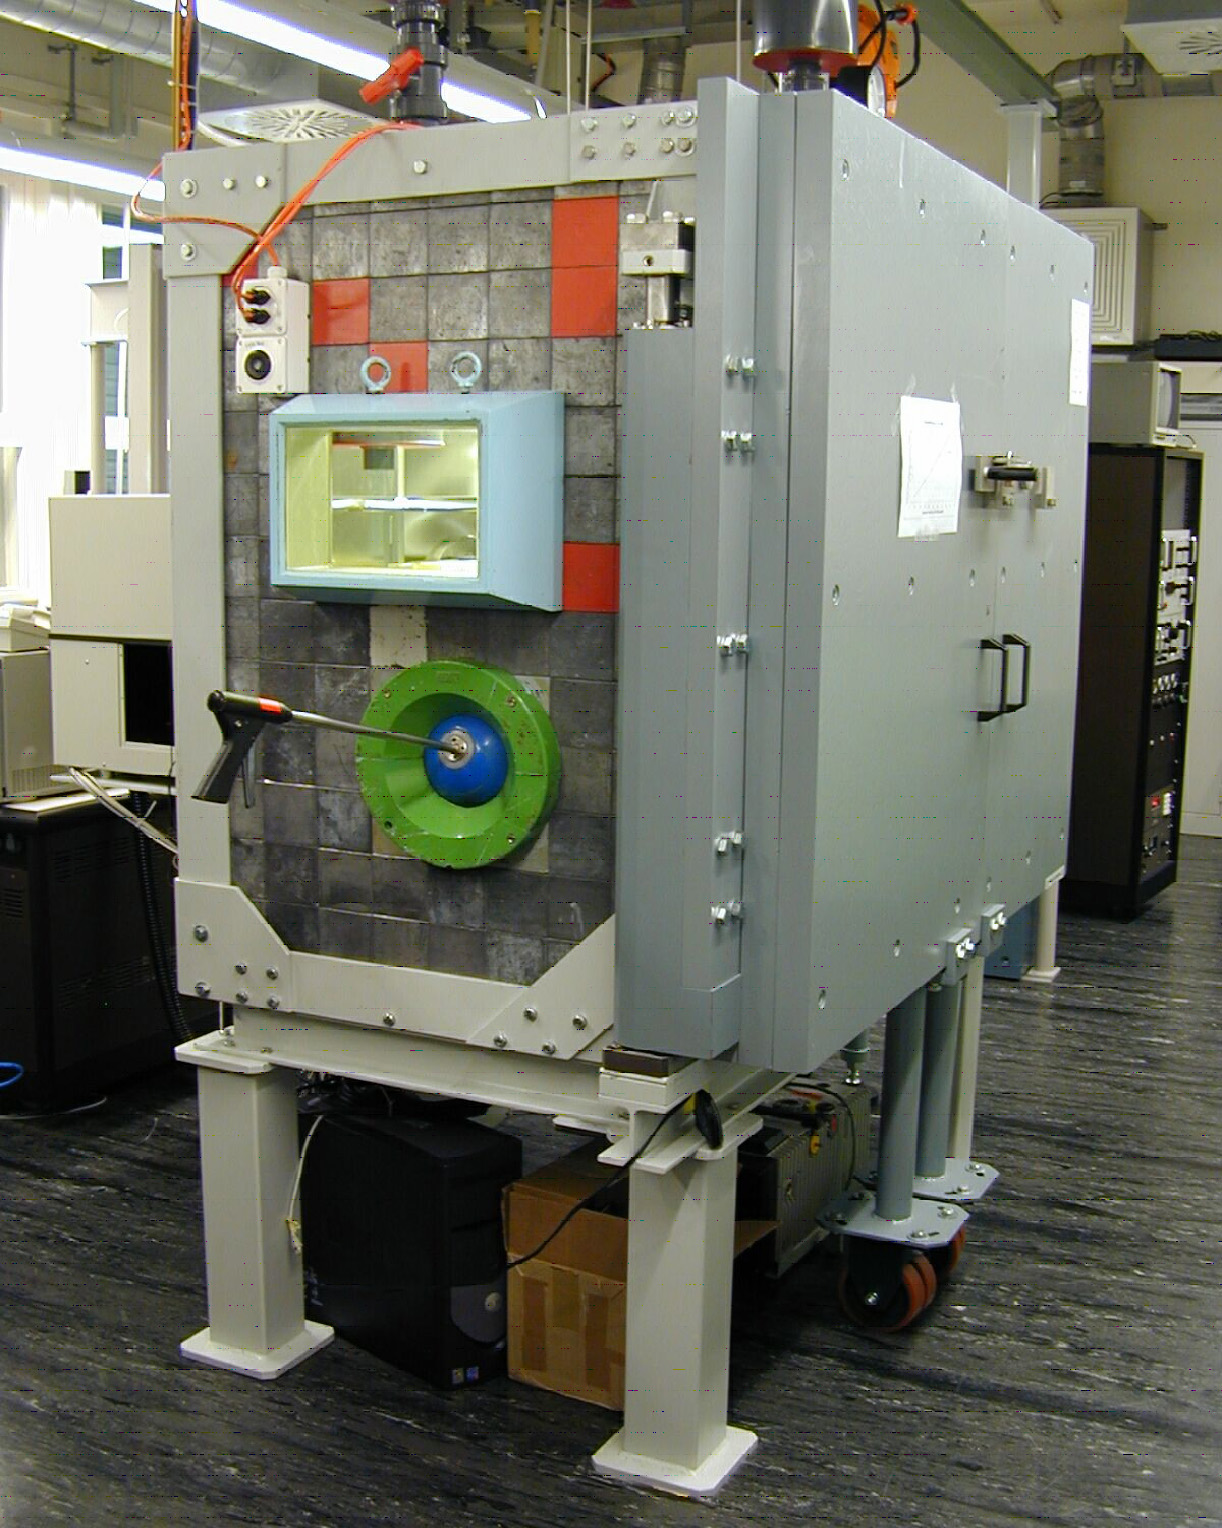


**Fig. S1** Photograph of the installed laser ablation system at PSI. From the construction, the lead window, the stick manipulator, the shielding and the steel doors are visible.

**Fig. S2** Linear correlation of the ICP-MS signal intensity to the crater area (top) and the laser energy density (bottom).Error bars represent 1s.
